# Supplementary material for: Epigenetic Age in Peripheral Blood Among Children, Adolescent, and Adult Survivors of Childhood Cancer
Source: PubMed Central journal article supplement (PMC10148192; doi:10.1001/jamanetworkopen.2023.10325), 2023-04-28
Supplement: jamanetwopen-e2310325-s001.pdf [file jamanetwopen-e2310325-s001.pdf]

## Supplementary Online Content

Plonski NM, Chen C, Dong Q, et al. Epigenetic age in peripheral blood among children, adolescent, and adult survivors of childhood cancer. *JAMA Netw Open*. 2023;6(4):e2310325. doi:10.1001/jamanetworkopen.2023.10325

**eFigure 1.** Cross-sectional Trend of Epigenetic Age Among Children and Adolescents, and Adult Survivors of Childhood Cancer

**eFigure 2.** Mean-Difference (Bland-Altman) Plots Showing the Difference Between Epigenetic Age (Four Different Clocks) and Chronological Age

**eFigure 3.** Epigenetic Age Acceleration Differs by CA-Defined Groups

**eTable 1.** Cross-sectional Annual Change Rate of Epigenetic Age for Survivors Within Each Chronological Age-Defined Group

**eTable 2.** Multivariable Linear Regression of EA\_Levine Against Age at DNA Sampling (Chronological Age)

**eTable 3.** Distributions of ALSM of EAA Adjusting for Sex and Treatment Exposures in Each Chronological Age-Defined Group

**eTable 4.** Associations Between EAA and Early-Onset Obesity

**eTable 5.** Associations Between EAA and Severity/Burden of All CHCs

**eTable 6.** Associations Between EAA and Late-Mortality

This supplementary material has been provided by the authors to give readers additional information about their work.

**eFigure 1. Cross-sectional trend of epigenetic age among children and adolescents, and adult survivors of childhood cancer.**

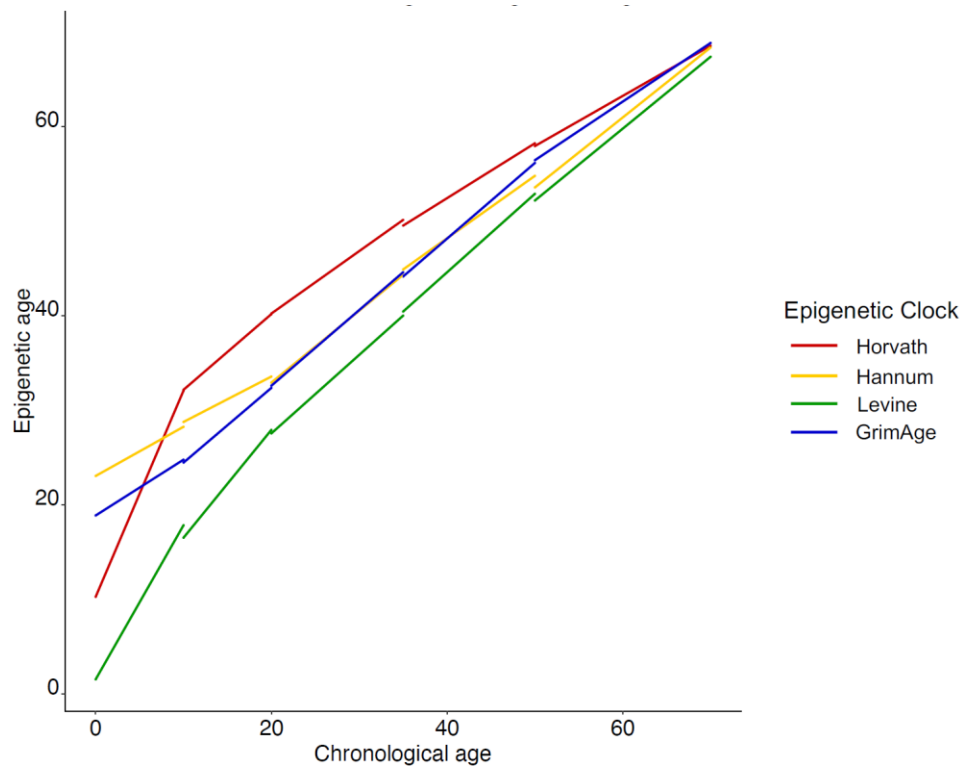

Epigenetic aging among children, adolescents, young adults, adults and older adults shows significantly different trend. EA\_Horvath shown in red and EA\_Levine shown in green had decreased trend (i.e., age slopes) across age groups from children to old adults. EA\_Hannum shown in yellow and EA\_GrimAge shown in blue had the highest trend in young adults and lower trend in children or old adults.

**eFigure 2. Mean-difference (Bland-Altman) plots showing the difference between epigenetic age (four different clocks) and chronological age.**

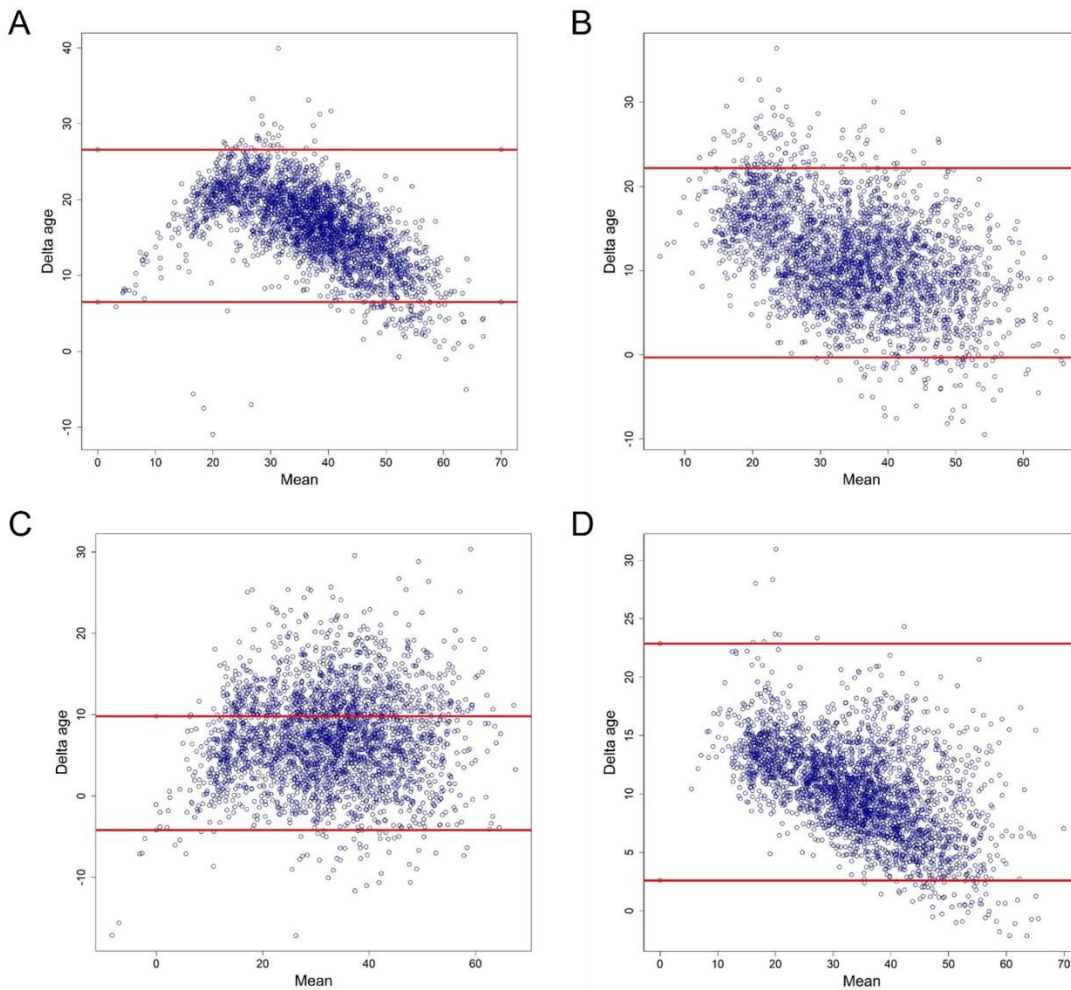

Delta age as calculated by CA-EA is shown in these Bland Altman plots. (A) We confirm EA\_Horvath clock has smaller delta age with children, adolescents, and older adults. (B) EA\_Hannum clock confirmed older adults have lower delta age but not children. (C) EA\_Hannum had more variability but still had a negative delta age for children and older adults. (D) EA\_GrimAge agrees with EA\_Hannum with a steady decrease in delta age as getting older.

**eFigure 3. Epigenetic age acceleration differs by CA-defined groups.**

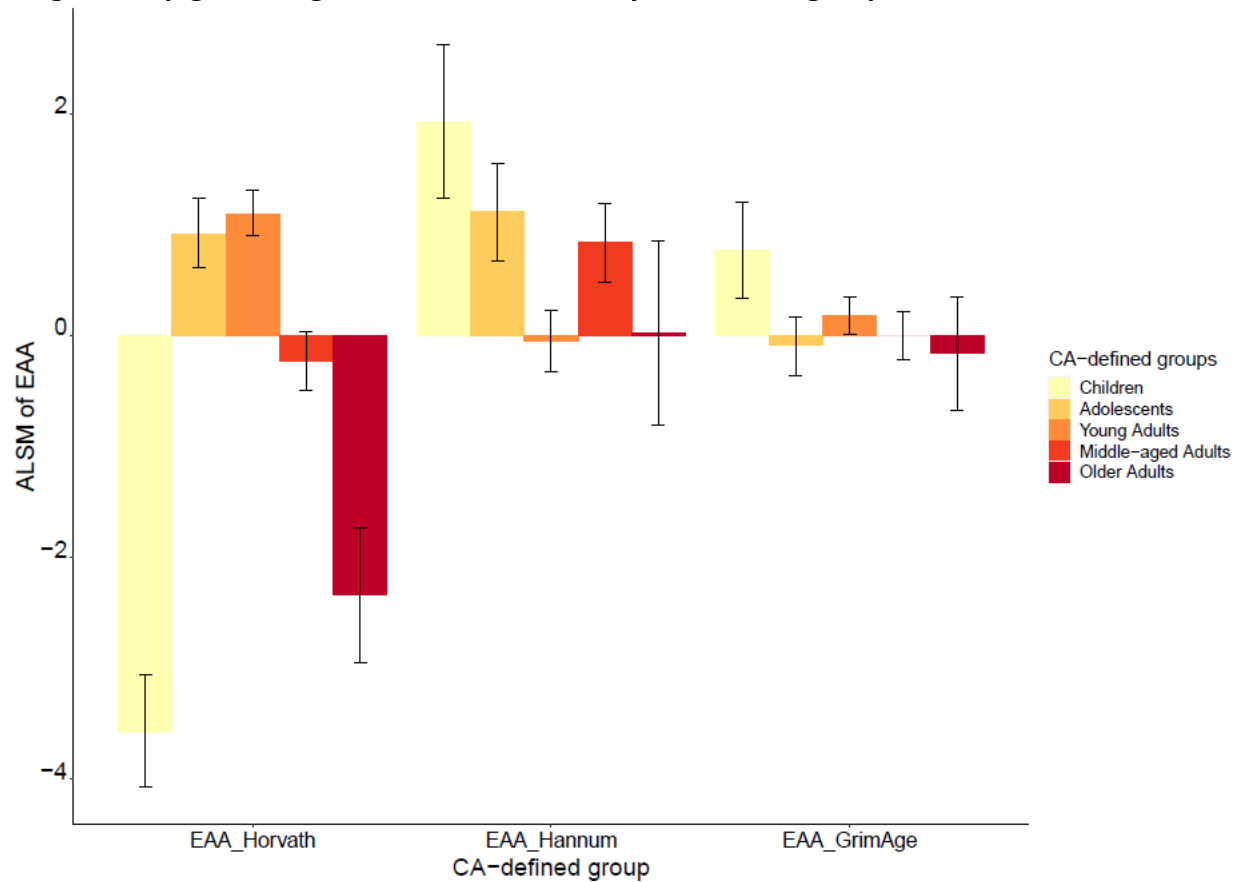

EAA\_Horvath showed lower negative ALSM for children, middle-aged adults and old adults, and higher positive ALSM for adolescents and young adults; EAA\_Hannum showed a positive ALSM for all CA groups except of young adults; EAA\_GrimAge had negative ALSM for both adolescents, middle-aged adults and old adults but positive ALSM for children and young adults. ALSM, adjusted least square means; CA, chronological age; EAA, epigenetic age acceleration.

**eTable 1. Cross-sectional annual change rate of epigenetic age for survivors within each chronological age-defined group.**

|                    | Coefficients | EA_Horvath | EA_Hannum | EA_Levine | EA_GrimAge |
|--------------------|--------------|------------|-----------|-----------|------------|
| Children           | Intercept    | 10.26      | 23.04     | 1.53      | 18.86      |
|                    | Beta         | 2.18       | 0.52      | 1.63      | 0.59       |
| Adolescents        | Intercept    | 24.15      | 23.95     | 5.11      | 16.55      |
|                    | Beta         | 0.8        | 0.48      | 1.14      | 0.79       |
| Young adults       | Intercept    | 27.01      | 17.71     | 10.94     | 16.58      |
|                    | Beta         | 0.66       | 0.76      | 0.83      | 0.8        |
| Middle-aged adults | Intercept    | 29.21      | 21.77     | 11.37     | 16.13      |
|                    | Beta         | 0.58       | 0.66      | 0.83      | 0.8        |
| Old adults         | Intercept    | 31.42      | 16.54     | 14.16     | 25.42      |
|                    | Beta         | 0.53       | 0.74      | 0.76      | 0.62       |

**eTable 2. Multivariable linear regression of EA\_Levine against age at DNA sampling (chronological age).**

| Coefficient                   | Beta  | SE   | P         |
|-------------------------------|-------|------|-----------|
| (Intercept)                   | 1.53  | 1.27 | 2.26E-01  |
| Sample Age                    | 1.63  | 0.16 | <2.00E-16 |
| Adolescents                   | 3.58  | 1.75 | 4.09E-02  |
| Young adults                  | 9.40  | 1.60 | 4.62E-09  |
| Middle-aged adults            | 9.84  | 2.35 | 3.03E-05  |
| Old adults                    | 12.62 | 7.47 | 9.12E-02  |
| Gender                        | -0.99 | 0.20 | 9.81E-07  |
| Chest-RT                      | 3.36  | 0.26 | <2.00E-16 |
| Alkylating agent, classic     | 1.70  | 0.21 | 1.62E-15  |
| Epipodophyllotoxins           | 0.89  | 0.23 | 8.80E-05  |
| Sample Age:Adolescents        | -0.49 | 0.18 | 6.61E-03  |
| Sample Age:Young adults       | -0.80 | 0.17 | 1.41E-06  |
| Sample Age:Middle-aged adults | -0.80 | 0.17 | 2.01E-06  |
| Sample Age:Old adults         | -0.88 | 0.21 | 3.45E-05  |

Abbreviations: SE, standard error.

**eTable 3. Distributions of ALSM of EAA adjusting for sex and treatment exposures in each chronological age-defined group.**

| Age Group          | EAA_Horvath |                    |                    | EAA_Hannum |                    |                    | EAA_Levine |                    |                    | EAA_GrimAge |                    |                    |
|--------------------|-------------|--------------------|--------------------|------------|--------------------|--------------------|------------|--------------------|--------------------|-------------|--------------------|--------------------|
|                    | ALSM        | 95% CI lower bound | 95% CI upper bound | ALSM       | 95% CI lower bound | 95% CI upper bound | ALSM       | 95% CI lower bound | 95% CI upper bound | ALSM        | 95% CI lower bound | 95% CI upper bound |
| Children           | -3.57       | -4.07              | -3.06              | 1.93       | 1.24               | 2.62               | -0.22      | -1.05              | 0.61               | 0.77        | 0.34               | 1.20               |
| Adolescents        | 0.92        | 0.61               | 1.24               | 1.12       | 0.68               | 1.55               | 1.32       | 0.81               | 1.84               | -0.09       | -0.36              | 0.17               |
| Young Adults       | 1.10        | 0.90               | 1.31               | -0.05      | -0.33              | 0.23               | 1.46       | 1.13               | 1.80               | 0.18        | 0.01               | 0.35               |
| Middle-aged Adults | -0.23       | -0.49              | 0.04               | 0.84       | 0.48               | 1.19               | 0.63       | 0.20               | 1.06               | 0.00        | -0.22              | 0.22               |
| Older Adults       | -2.34       | -2.95              | -1.73              | 0.03       | -0.81              | 0.86               | -1.70      | -2.70              | -0.70              | -0.16       | -0.68              | 0.35               |

Abbreviations: ALSM, Adjusted Least Square Means; EAA, Epigenetic Accelerated Age; CI, Confidence interval.

**eTable 4. Associations between EAA and early-onset obesity.**

| Coefficients              | EAA_Horvath |           |          | EAA_Hannum |           |          | EAA_Levine |           |                 | GrimAge |           |                 |
|---------------------------|-------------|-----------|----------|------------|-----------|----------|------------|-----------|-----------------|---------|-----------|-----------------|
|                           | OR          | 95% CI    | P        | OR         | 95% CI    | P        | OR         | 95% CI    | P               | OR      | 95% CI    | P               |
| (Intercept)               | 0.73        | 0.52-1.02 | 6.64E-02 | 0.72       | 0.51-1.01 | 5.69E-02 | 0.81       | 0.57-1.15 | 2.34E-01        | 0.72    | 0.51-1.01 | 5.53E-02        |
| EAA                       | 1.25        | 1.03-1.51 | 2.44E-02 | 1.18       | 0.99-1.41 | 6.85E-02 | 1.46       | 1.19-1.78 | <b>2.19E-04</b> | 1.42    | 1.15-1.75 | <b>1.30E-03</b> |
| Gender                    | 0.88        | 0.62-1.26 | 4.97E-01 | 0.84       | 0.59-1.20 | 3.52E-01 | 0.89       | 0.62-1.27 | 5.21E-01        | 1.07    | 0.72-1.57 | 7.46E-01        |
| Brain-RT                  | 1.77        | 0.94-3.34 | 7.64E-02 | 2.03       | 1.08-3.82 | 2.88E-02 | 1.81       | 0.96-3.41 | 6.76E-02        | 1.91    | 1.01-3.60 | 4.52E-02        |
| Neck-RT                   | 0.67        | 0.21-2.14 | 4.99E-01 | 0.71       | 0.22-2.25 | 5.55E-01 | 0.73       | 0.23-2.36 | 6.02E-01        | 0.75    | 0.23-2.44 | 6.34E-01        |
| Chest-RT                  | 0.58        | 0.21-1.58 | 2.83E-01 | 0.62       | 0.23-1.68 | 3.47E-01 | 0.49       | 0.18-1.37 | 1.74E-01        | 0.63    | 0.23-1.75 | 3.73E-01        |
| Abdomen-RT                | 0.81        | 0.28-2.31 | 6.90E-01 | 0.87       | 0.30-2.48 | 7.94E-01 | 0.91       | 0.32-2.62 | 8.61E-01        | 0.90    | 0.31-2.59 | 8.44E-01        |
| Pelvis-RT                 | 1.26        | 0.39-4.01 | 6.98E-01 | 1.13       | 0.36-3.58 | 8.36E-01 | 1.12       | 0.35-3.61 | 8.46E-01        | 0.91    | 0.28-2.96 | 8.74E-01        |
| Alkylating agent, classic | 0.81        | 0.51-1.28 | 3.59E-01 | 0.79       | 0.50-1.26 | 3.28E-01 | 0.74       | 0.47-1.18 | 2.13E-01        | 0.75    | 0.47-1.19 | 2.19E-01        |
| Epipodophyllotoxins       | 0.92        | 0.61-1.39 | 6.95E-01 | 0.91       | 0.61-1.37 | 6.66E-01 | 0.86       | 0.57-1.30 | 4.79E-01        | 0.84    | 0.56-1.28 | 4.22E-01        |
| Anthracyclines            | 1.34        | 0.82-2.20 | 2.48E-01 | 1.39       | 0.85-2.29 | 1.90E-01 | 1.21       | 0.73-2.00 | 4.62E-01        | 1.29    | 0.78-2.13 | 3.22E-01        |

Abbreviations: OR, odds ratio; EAA, Epigenetic Accelerated Age; CI, Confidence interval.



**eTable 5. Associations between EAA and severity/burden of all CHCs.**

| Coefficients              | EAA_Horvath |            |          | EAA_Hannum |            |                 | EAA_Levine |            |                 | EAA_GrimAge |            |                 |
|---------------------------|-------------|------------|----------|------------|------------|-----------------|------------|------------|-----------------|-------------|------------|-----------------|
|                           | OR          | 95% CI     | P        | OR         | 95% CI     | P               | OR         | 95% CI     | P               | OR          | 95% CI     | P               |
| (Intercept)               | 1.20        | 0.83-1.76  | 3.34E-01 | 1.11       | 0.77-1.60  | 5.84E-01        | 1.22       | 0.85-1.77  | 2.84E-01        | 1.11        | 0.77-1.60  | 5.70E-01        |
| EAA                       | 1.04        | 0.95-1.14  | 3.76E-01 | 1.14       | 1.04-1.25  | <b>3.63E-03</b> | 1.13       | 1.03-1.24  | <b>8.03E-03</b> | 1.16        | 1.05-1.28  | <b>2.91E-03</b> |
| Attained Age              | 0.99        | 0.98-1.00  | 4.66E-02 | 0.99       | 0.98-1.00  | 5.75E-02        | 0.99       | 0.98-1.00  | 5.60E-02        | 0.99        | 0.98-1.00  | 3.93E-02        |
| Gender                    | 1.10        | 0.93-1.31  | 2.61E-01 | 1.13       | 0.95-1.34  | 1.81E-01        | 1.12       | 0.94-1.33  | 2.00E-01        | 1.21        | 1.01-1.46  | 4.04E-02        |
| Adolescents               | 0.70        | 0.47-1.03  | 7.15E-02 | 0.75       | 0.51-1.10  | 1.36E-01        | 0.71       | 0.48-1.04  | 7.56E-02        | 0.76        | 0.52-1.11  | 1.61E-01        |
| Young adults              | 1.54        | 1.05-2.27  | 2.78E-02 | 1.72       | 1.19-2.49  | 4.12E-03        | 1.57       | 1.08-2.27  | 1.69E-02        | 1.68        | 1.16-2.42  | 6.01E-03        |
| Middle-aged adults        | 4.41        | 2.77-7.02  | 4.11E-10 | 4.70       | 2.97-7.42  | 3.58E-11        | 4.47       | 2.83-7.06  | 1.44E-10        | 4.78        | 3.02-7.56  | 2.42E-11        |
| Old adults                | 7.04        | 3.23-15.35 | 9.50E-07 | 7.47       | 3.42-16.30 | 4.40E-07        | 7.31       | 3.35-15.94 | 5.84E-07        | 7.58        | 3.47-16.58 | 3.92E-07        |
| Brain-RT                  | 1.88        | 1.49-2.37  | 8.79E-08 | 1.91       | 1.52-2.41  | 4.40E-08        | 1.91       | 1.52-2.41  | <b>4.40E-08</b> | 1.93        | 1.53-2.43  | 3.05E-08        |
| Neck-RT                   | 1.05        | 0.70-1.57  | 8.20E-01 | 1.02       | 0.68-1.54  | 9.17E-01        | 1.02       | 0.68-1.54  | 9.08E-01        | 1.05        | 0.70-1.58  | 8.11E-01        |
| Chest-RT                  | 1.10        | 0.73-1.66  | 6.54E-01 | 1.08       | 0.72-1.64  | 6.99E-01        | 1.07       | 0.71-1.62  | 7.42E-01        | 1.09        | 0.72-1.65  | 6.72E-01        |
| Abdomen-RT                | 1.06        | 0.70-1.61  | 7.72E-01 | 1.05       | 0.69-1.59  | 8.26E-01        | 1.04       | 0.68-1.58  | 8.56E-01        | 1.06        | 0.70-1.61  | 7.76E-01        |
| Pelvis-RT                 | 1.51        | 1.00-2.29  | 5.17E-02 | 1.51       | 0.99-2.29  | 5.33E-02        | 1.50       | 0.99-2.28  | 5.60E-02        | 1.48        | 0.98-2.25  | 6.20E-02        |
| Alkylating agent, classic | 1.36        | 1.11-1.66  | 2.97E-03 | 1.35       | 1.10-1.64  | 3.70E-03        | 1.32       | 1.08-1.61  | <b>7.15E-03</b> | 1.33        | 1.09-1.62  | 5.55E-03        |
| Epipodophyllotoxins       | 0.86        | 0.71-1.05  | 1.33E-01 | 0.85       | 0.70-1.04  | 1.13E-01        | 0.84       | 0.69-1.02  | 8.54E-02        | 0.84        | 0.69-1.03  | 8.75E-02        |
| Anthracyclines            | 0.68        | 0.55-0.85  | 6.20E-04 | 0.69       | 0.55-0.85  | 6.81E-04        | 0.67       | 0.54-0.84  | <b>3.91E-04</b> | 0.67        | 0.54-0.83  | 2.88E-04        |

Abbreviations: OR, odds ratio; EAA, Epigenetic Accelerated Age; CI, Confidence interval.

**eTable 6. Associations between EAA and late-mortality.**

| Coefficients              | Horvath |           |          | Hannum |           |          | Levine |           |                 | GrimAge |           |                 |
|---------------------------|---------|-----------|----------|--------|-----------|----------|--------|-----------|-----------------|---------|-----------|-----------------|
|                           | OR      | 95%CI     | P        | OR     | 95%CI     | P        | OR     | 95%CI     | P               | OR      | 95%CI     | P               |
| Gender                    | 0.53    | 0.32-0.88 | 1.48E-02 | 0.54   | 0.33-0.91 | 1.93E-02 | 0.55   | 0.33-0.93 | 2.41E-02        | 0.77    | 0.45-1.31 | 3.30E-01        |
| EAA                       | 1.11    | 0.83-1.48 | 4.69E-01 | 1.13   | 0.89-1.45 | 3.16E-01 | 1.75   | 1.35-2.26 | <b>1.90E-05</b> | 1.63    | 1.32-2.02 | <b>5.13E-06</b> |
| Sample Age                | 1.08    | 1.05-1.11 | 6.43E-07 | 1.07   | 1.04-1.10 | 6.07E-07 | 1.08   | 1.05-1.11 | 3.61E-08        | 1.07    | 1.04-1.10 | 1.20E-06        |
| Brain-RT                  | 0.96    | 0.55-1.66 | 8.75E-01 | 0.99   | 0.56-1.72 | 9.59E-01 | 1.15   | 0.66-2.00 | 6.25E-01        | 1.09    | 0.62-1.90 | 7.67E-01        |
| Neck-RT                   | 1.97    | 0.81-4.79 | 1.33E-01 | 1.92   | 0.79-4.70 | 1.51E-01 | 1.70   | 0.69-4.20 | 2.48E-01        | 1.65    | 0.69-3.97 | 2.61E-01        |
| Chest-RT                  | 1.88    | 0.70-5.06 | 2.10E-01 | 1.87   | 0.69-5.04 | 2.18E-01 | 1.76   | 0.65-4.80 | 2.68E-01        | 2.18    | 0.82-5.76 | 1.16E-01        |
| Abdomen-RT                | 1.57    | 0.65-3.75 | 3.13E-01 | 1.58   | 0.66-3.77 | 3.08E-01 | 1.23   | 0.51-2.96 | 6.39E-01        | 1.50    | 0.62-3.64 | 3.66E-01        |
| Pelvis-RT                 | 0.91    | 0.42-1.98 | 8.20E-01 | 0.92   | 0.42-2.01 | 8.37E-01 | 1.03   | 0.48-2.20 | 9.41E-01        | 0.93    | 0.43-2.03 | 8.57E-01        |
| Alkylating agent, classic | 1.35    | 0.77-2.36 | 2.97E-01 | 1.34   | 0.77-2.35 | 3.05E-01 | 1.13   | 0.64-1.98 | 6.80E-01        | 1.21    | 0.69-2.14 | 5.05E-01        |
| Epipodophyllotoxins       | 1.06    | 0.52-2.20 | 8.66E-01 | 1.07   | 0.52-2.22 | 8.54E-01 | 0.99   | 0.48-2.04 | 9.74E-01        | 1.00    | 0.48-2.09 | 9.90E-01        |
| Anthracyclines            | 0.49    | 0.28-0.85 | 1.16E-02 | 0.50   | 0.29-0.86 | 1.32E-02 | 0.52   | 0.30-0.90 | 1.97E-02        | 0.47    | 0.27-0.83 | 8.53E-03        |

Abbreviations: OR, odds ratio; EAA, Epigenetic Accelerated Age; CI, Confidence interval.
