# Supplementary material for: Epigenetic Age in Peripheral Blood Among Children, Adolescent, and Adult Survivors of Childhood Cancer
Source: PubMed Central journal article supplement (PMC10148192; doi:10.1001/jamanetworkopen.2023.10325), 2023-04-28
Supplement: jamanetwopen-e2310325-s002.pdf [file jamanetwopen-e2310325-s002.pdf]

## Data Sharing Statement

Plonski. Epigenetic Age in Peripheral Blood Among Children, Adolescent, and Adult Survivors of Childhood Cancer. *JAMA Netw Open*. Published April 28, 2023.

doi:10.1001/jamanetworkopen.2023.10325

### Data

**Data available:** Yes

**Data types:** Deidentified participant data

**How to access data:** The data is accessible through the St. Jude Cloud (<https://stjude.cloud>)

**When available:** With publication

### Supporting Documents

**Document types:** None

### Additional Information

**Who can access the data:** researchers whose proposed use of the data has been approved

**Types of analyses:** for research purpose

**Mechanisms of data availability:** after approval of a proposal by the data access committee and with a signed data access agreement
